# Supplementary material for: Energy stress-induced lncRNA FILNC1 represses c-Myc-mediated energy metabolism and inhibits renal tumor development
Source: PubMed Central journal article supplement (PMC5627275; doi:10.1038/s41467-017-00902-z), 2017-10-04
Supplement: 41467_2017_902_MOESM1_ESM.pdf [file 41467_2017_902_MOESM1_ESM.pdf]

### **Description of Supplementary Files**

File Name: Supplementary Information

Description: Supplementary Figures and Supplementary Methods

File Name: Supplementary Data 1

Description: The list of FILNC1-interacting proteins under 1 mM glucose condition identified by mass spectrometry analysis.

File Name: Peer Review File

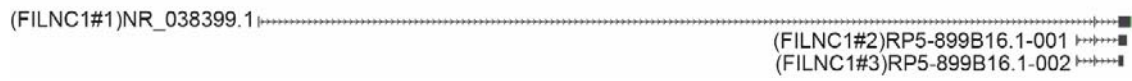

**Supplementary Figure 1. The schematic diagram of the genomic region of *FILNC1* with different splicing isoforms.** Arrows and black boxes represent the direction of transcription and exons respectively.

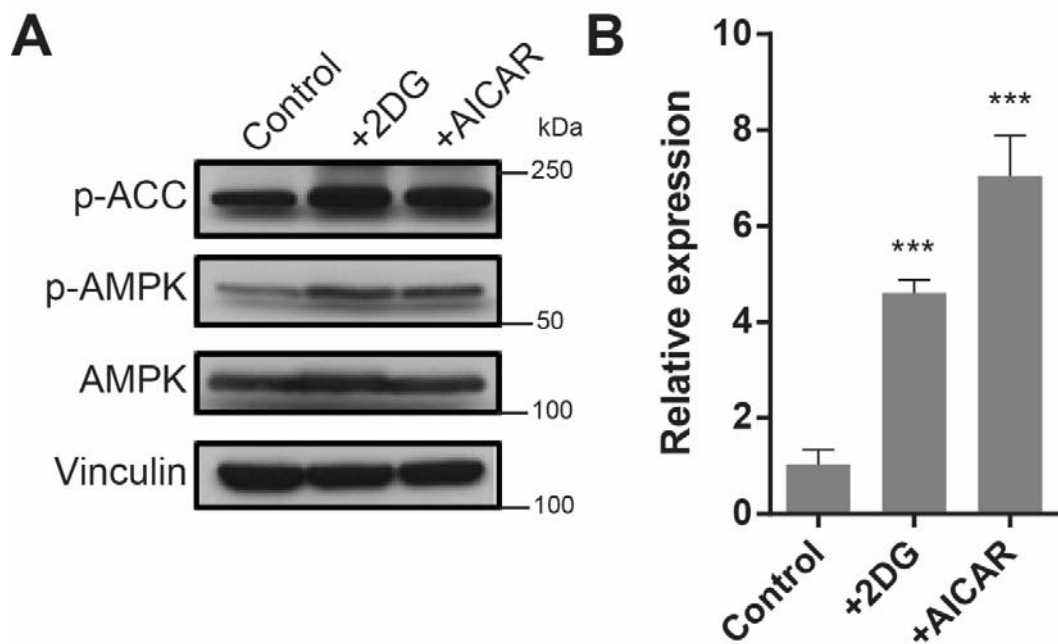

**Supplementary Figure 2. *FILNC1* is up-regulated in renal cancer cells when treated with 2DG or AICAR.** (A) 786-O cells were treated with 5 mM 2-DG or 500 nM AICAR for 24 hours and then were subjected to Western blot. (B) Bar graph shows the relative expression changes of *FILNC1* by real-time PCR in 786-O cells that had been treated with 5 mM 2DG or 500 nM AICAR for 24 hours. Values represent mean  $\pm$  s.d. from three independent experiments, two-tailed Student's t-test. \*\*\*:  $P < 0.001$ .

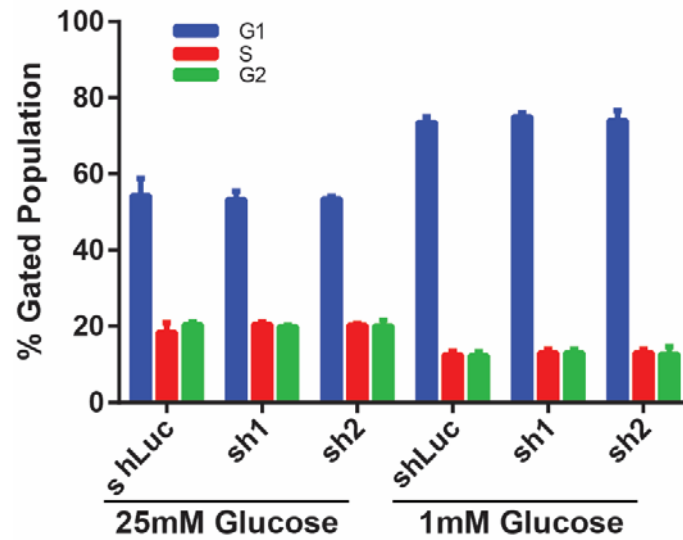

**Supplementary Figure 3. *FILNC1* deficiency does not affect the cell cycle.** 786-O cells infected with control shRNA or *FILNC1* shRNAs were cultured in 25 or 1 mM glucose-containing medium for 24 hours, and then subjected to cell cycle analysis by flow cytometry. Values represent mean  $\pm$  s.d. from three independent experiments.

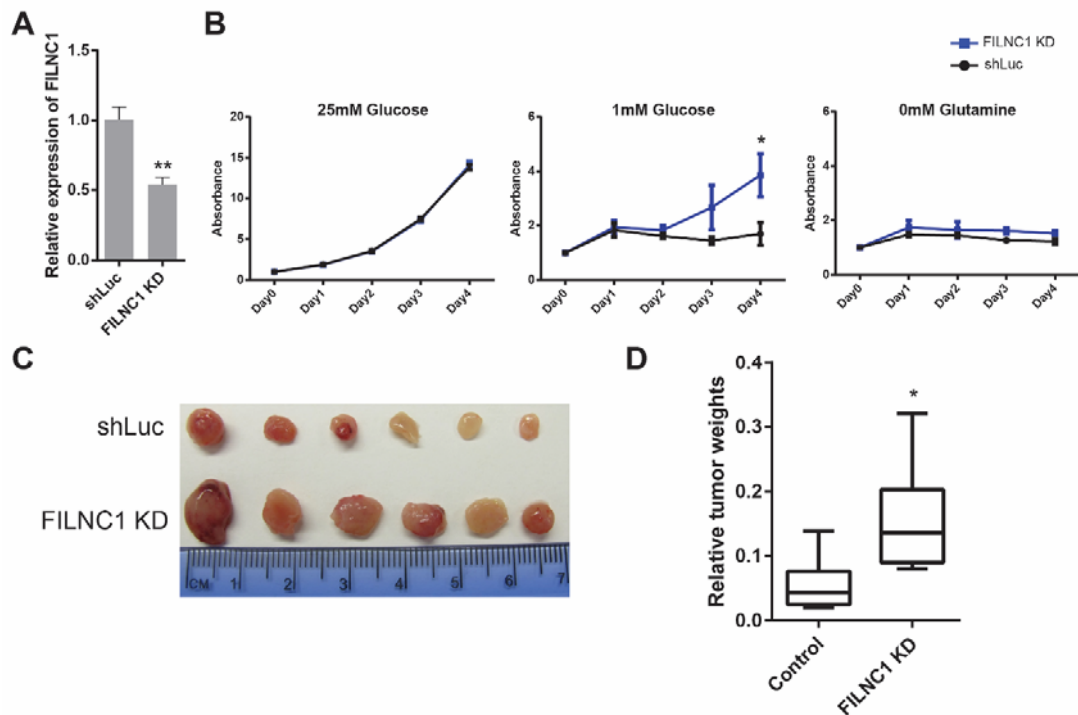

**Supplementary Figure 4. *FILNC1* deficiency protects renal cancer from cell death under energy stress and promotes renal tumor development.** (A) Bar graph shows *FILNC1* shRNA-mediated knockdown efficiency in UMRC2 cells. (B) UMRC2 cells infected with either control shRNA or *FILNC1* shRNA were cultured in various medium for different days as indicated, and then subjected to cell proliferation analysis. (C-D) Xenograft tumour images (C) and weights (D, mean  $\pm$  s.d, n=6 xenograft tumors, two-tailed Student's t-test) of UMRC2 cells infected with either control shRNA or *FILNC1* shRNA. All values, unless otherwise noted, represent mean  $\pm$  s.d. from three independent experiments, two-tailed Student's t-test. \*: P < 0.05.

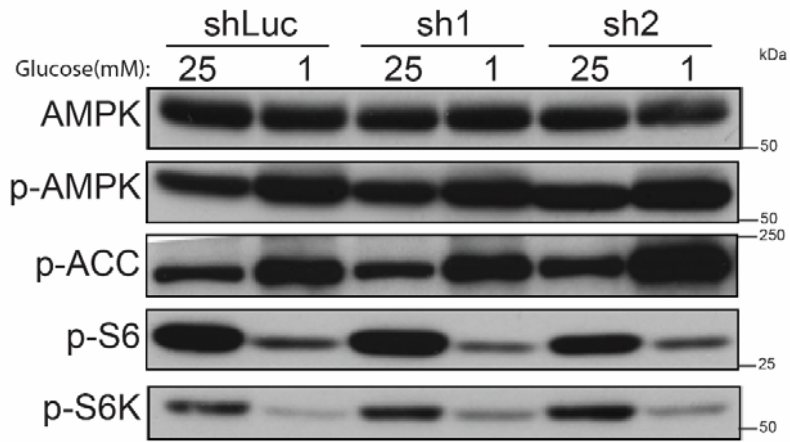

**Supplementary Figure 5. *FILNC1* deficiency does not affect AMPK activation or mTORC1 inactivation under glucose starvation.** Control shRNA or *FILNC1* shRNA-infected 786-O cells were cultured in 25 or 1 mM glucose-containing medium for 24 hours, then subjected to Western blotting analysis as indicated.

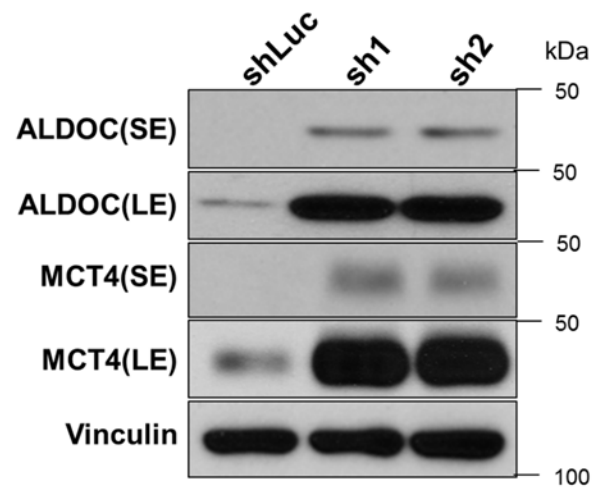

**Supplementary Figure 6. *FILNC1* knockdown increases ALDOC and MCT4 protein level.** Control shRNA or *FILNC1* shRNA-infected 786-O cells were cultured 1 mM glucose-containing medium for 24 hours, then subjected to Western blotting analysis. SE, short exposure; LE, long exposure.

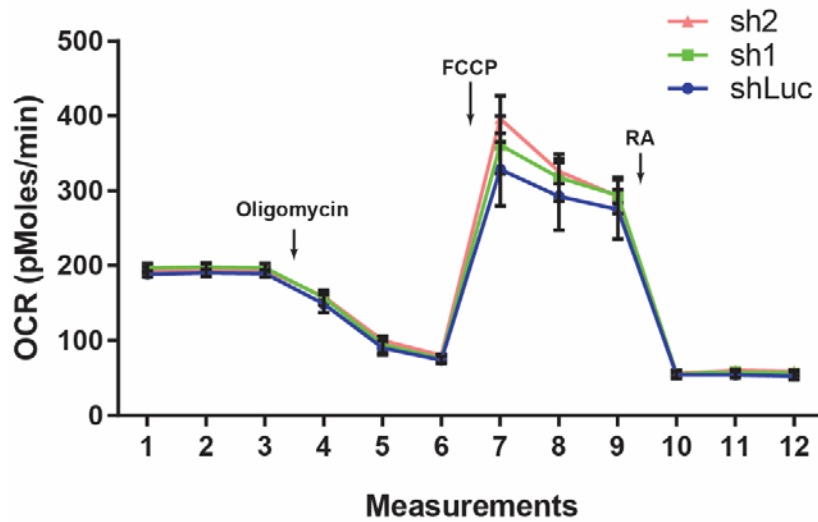

**Supplementary Figure 7. *FILNC1* deficiency does not affect oxygen consumption rate under glucose starvation.** Oxygen consumption rate of Control and *FILNC1* knock-down 786-O cells was measured in the XF96 Analyzer. All values represent mean  $\pm$  s.d. from three independent experiments.



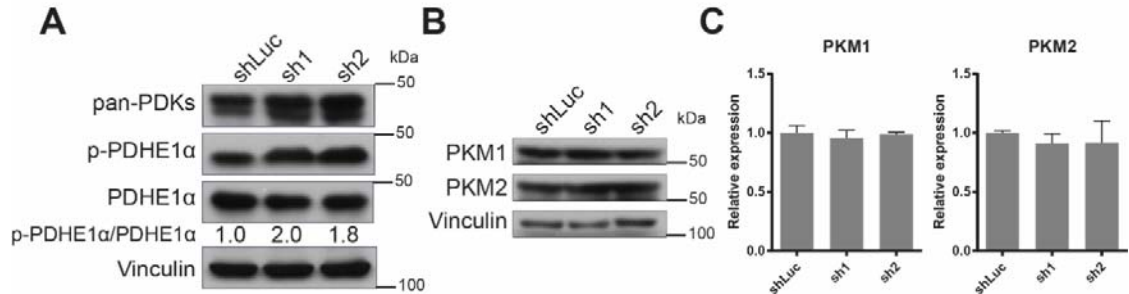

**Supplementary Figure 8. *FILNC1* knockdown increases PDK protein level and PDH phosphorylation, but does not affect PKM1/2 isoform switch. (A-B)** Control shRNA or *FILNC1* shRNA-infected 786-O cells were cultured 1 mM glucose-containing medium for 24 hours, then subjected to Western blotting analysis. **(C)** Real-time PCR analysis of PKM1 and PKM2 in control shRNA or *FILNC1* shRNA-infected 786-O cells under low glucose condition. All values represent mean  $\pm$  s.d. from three independent experiments.

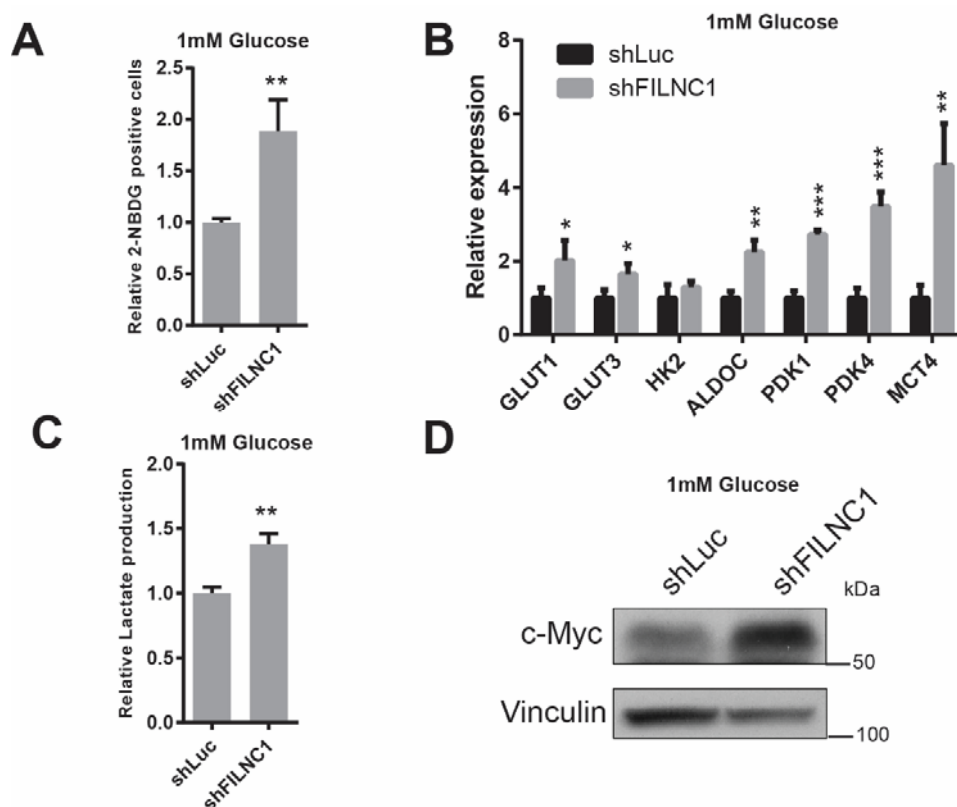

**Supplementary Figure 9. *FILNC1* deficiency increases c-Myc protein level and glucose metabolism genes, and promotes glucose uptake and lactate production in UMRC2 cells.** (A-C) UMRC2 cells infected with either control shRNA or *FILNC1* shRNA were cultured in 25 or 1 mM glucose-containing medium for 48 hours, and then subjected to various analyses to measure the expression levels of genes involved in glucose metabolism by real-time PCR (A), glucose uptake (B) and lactate production (C). All values represent mean  $\pm$  s.d. from three independent experiments, two-tailed Student's t-test. \*:  $P < 0.05$ ; \*\*:  $P < 0.01$ ; \*\*\*:  $P < 0.001$ . (D) Western blotting analysis to measure c-Myc protein in UMRC2 cells infected with control shRNA or *FILNC1* shRNA which had been cultured in 1 mM glucose-containing medium for 24 hours.

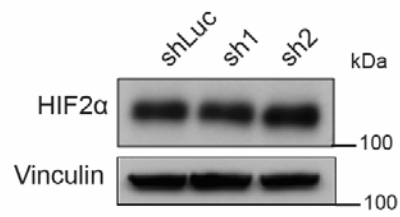

**Supplementary Figure 10. *FILNC1* knockdown did not affect HIF2 $\alpha$  protein levels.** Control or *FILNC1* shRNA-infected 786-O cells were cultured in 1 mM glucose-containing medium for 24 hours, then subjected to Western blotting analysis to measure HIF2 $\alpha$  protein.

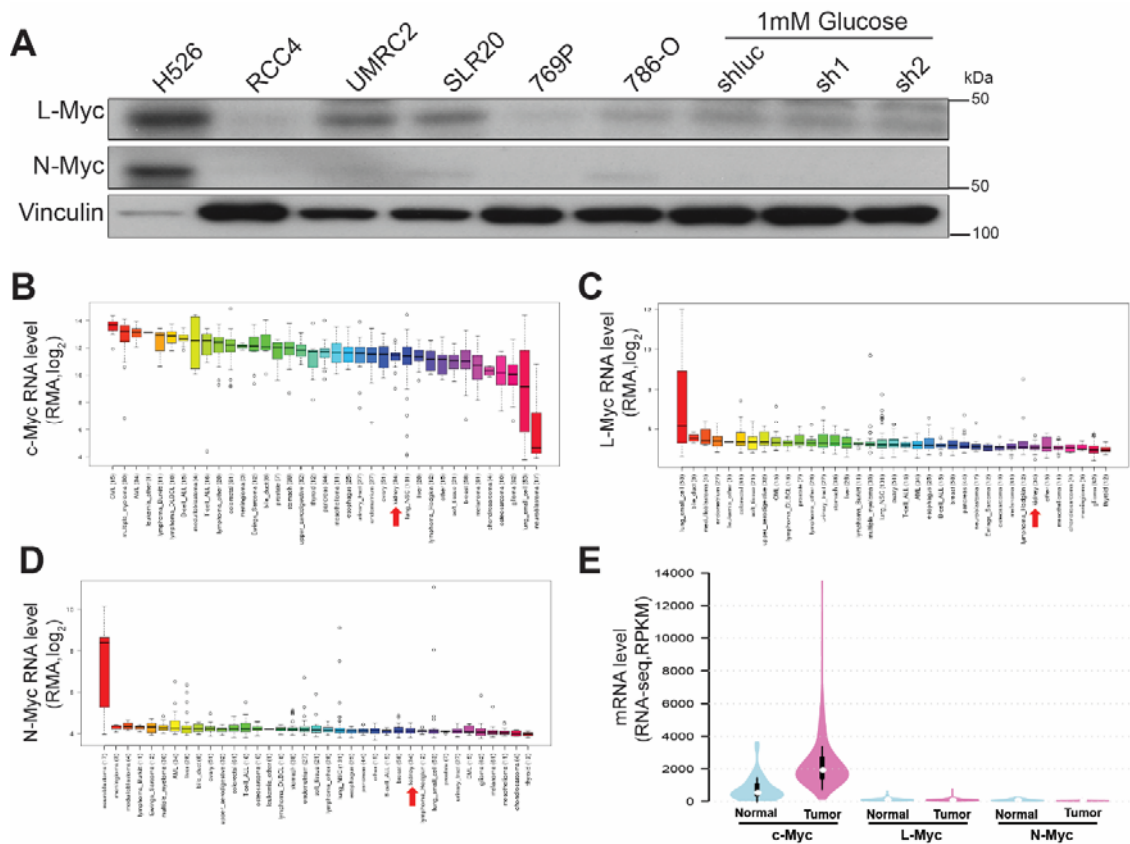

**Supplementary Figure 11. L-Myc and N-Myc expression in renal cancer cell lines and tumors.** (A) The protein levels of L- and N-Myc in kidney cancer cells and control shRNA or *FILNC1* shRNA-infected 786-O cells under glucose starvation condition. H526 lung cancer cell was used as a positive control. (B-D) The mRNA expression levels of *c-Myc*, *L-Myc*, and *N-Myc* in various cancer cell lines. Red arrows point to renal cancer cells. Expression data were obtained from CCLE expression datasets. (E) The mRNA expression levels of *c-Myc*, *L-Myc*, and *N-Myc* in renal cancer and normal kidneys. Expression data were obtained from TCGA ccRCC RNA-seq datasets.

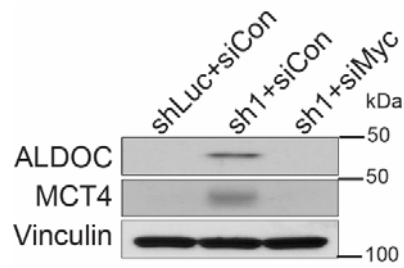

**Supplementary Figure 12. Knocking down c-Myc in *FILNC1* deficient 786-O cells represses the ALDOC and MCT4 protein levels.** Control shRNA or *FILNC1* shRNA-infected 786-O cells were transfected with c-Myc siRNA. The cells were cultured in 1 mM glucose-containing medium for 24 hours, and c-Myc protein level was detected by Western blotting.

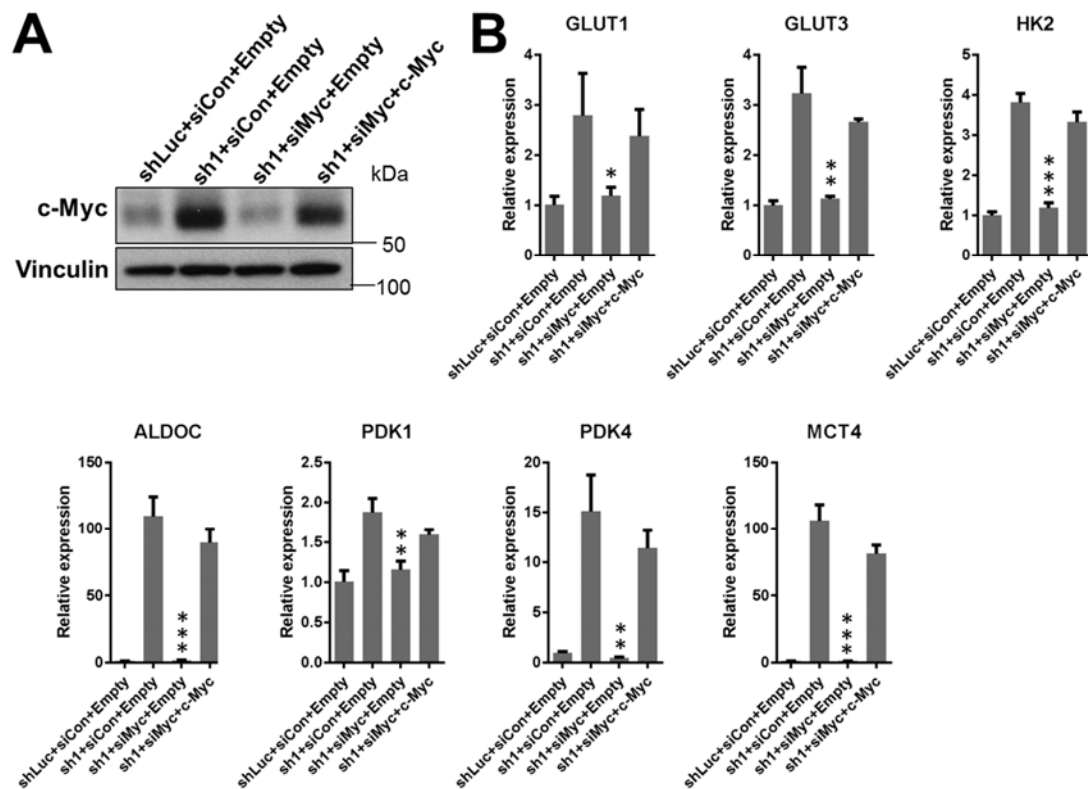

**Supplementary Figure 13. c-Myc restoration normalized the downregulation of expression levels of glucose metabolism genes caused by c-Myc knockdown in 786-O cells.** c-Myc was re-expressed in *FILNC1/c-Myc* double knockdown cells. The cells were cultured in 1 mM glucose-containing medium for 24 hours, and c-Myc protein level was detected by Western blotting (A). The expression levels of genes involved in glucose metabolism were measured by real-time PCR (B). All values represent mean  $\pm$  s.d. from three independent experiments, two-tailed Student's t-test. \*:  $P < 0.05$ ; \*\*:  $P < 0.01$ ; \*\*\*:  $P < 0.001$ .

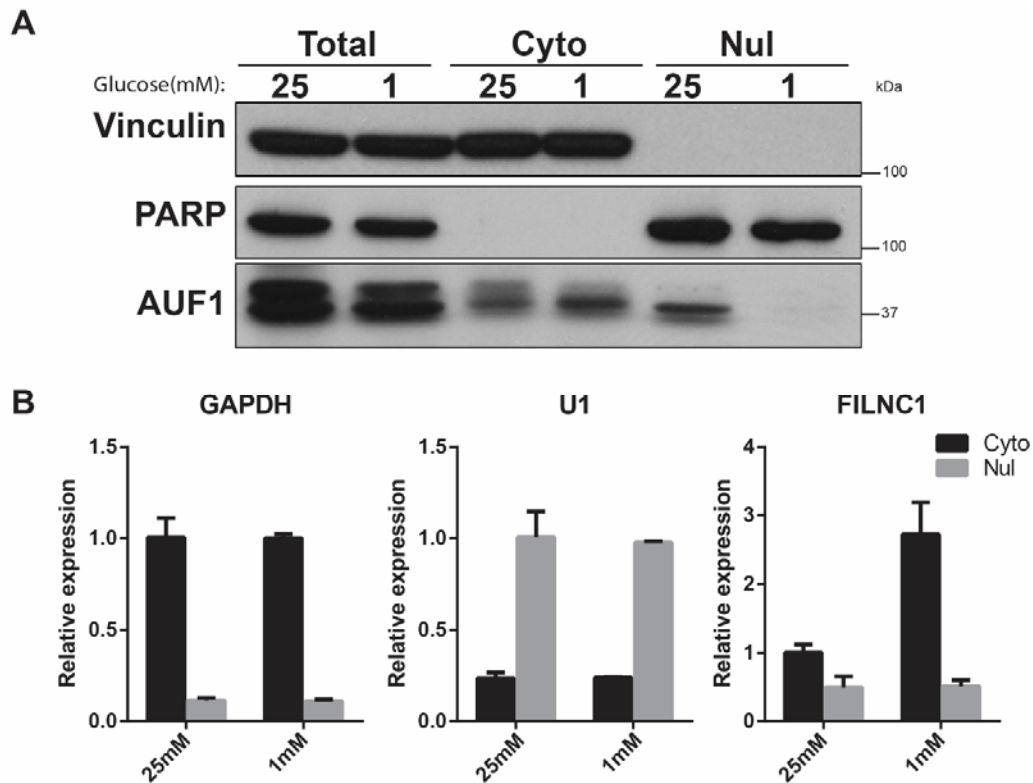

**Supplementary Figure 14. Glucose starvation regulates AUF1 and FILNC1 subcellular localization.** 786-O cells were cultured in 20 mM or 1 mM glucose for 24 hours, then subjected to nucleus (nul)/cytoplasm (cyt) fractionation analysis and Western blotting (A) or real-time PCR experiments (B). Vinculin and PARP serve as markers of cytoplasm and nucleus in Western blotting. GAPDH and U1 serve as markers of cytoplasm and nucleus in real-time PCR. All values, unless otherwise noted, represent mean  $\pm$  s.d. from three independent experiments.

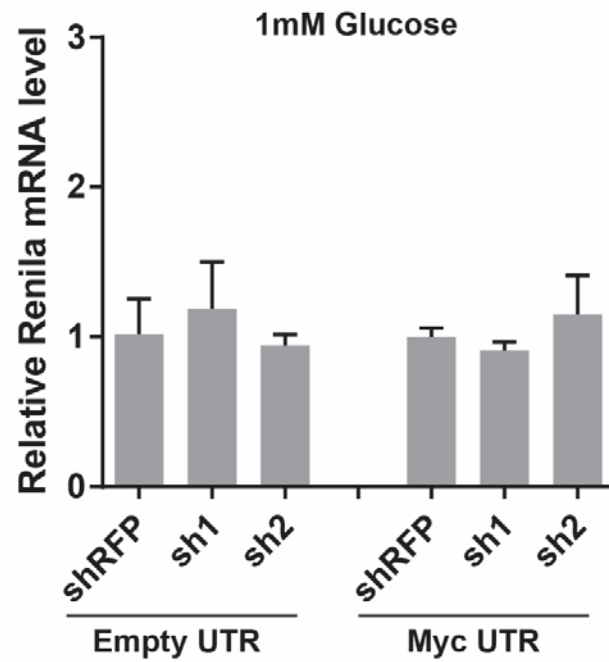

**Supplementary Figure 15. *FILNC1* deficiency does not affect luciferase reporter mRNA level.** Renilla luciferase mRNA level of a reporter fused to a c-Myc or empty 3' UTR in 786-O cells that had been cultured in 1 mM glucose-containing medium for 24 hours. mRNA levels were normalized using Firefly luciferase mRNA levels. All values mean  $\pm$  s.d. from three independent experiments.



### Raw C<sub>t</sub> Values

|               | 786-O |       |       | 769P+ <i>FILNC1</i> |       |       |
|---------------|-------|-------|-------|---------------------|-------|-------|
| GAPDH         | 15.04 | 15.8  | 15.77 | 15.68               | 15.51 | 15.7  |
| <i>FILNC1</i> | 24.21 | 24.71 | 24.04 | 22.85               | 21.95 | 23.09 |

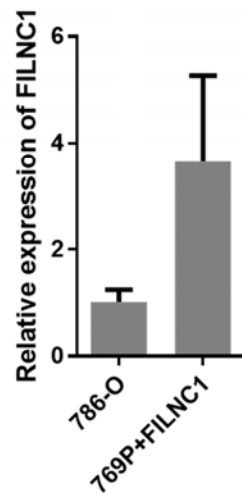

**Supplementary Figure 16. Comparison of *FILNC1* expression in 786-O and *FILNC1* over-expressed 769P cells under glucose starvation condition.** The raw C<sub>t</sub> values and relative expression levels of endogenous *FILNC1* in 786-O cells and over-expressed *FILNC1* in 769P cells cultured in 1 mM glucose-containing medium for 24 hours were measured by real-time PCR. All values mean ± s.d. from three independent experiments.

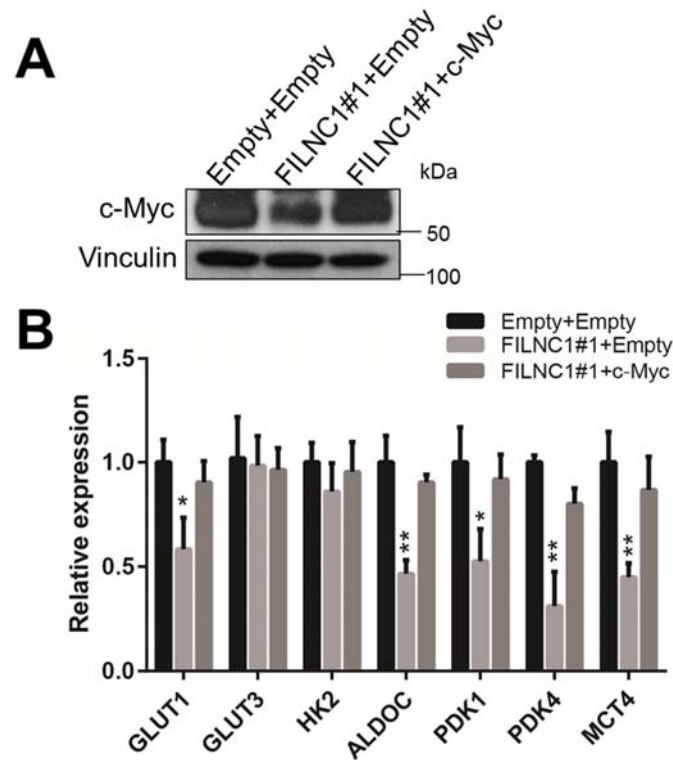

**Supplementary Figure 17. c-Myc restoration normalized the downregulation of expression levels of glucose metabolism genes caused by *FILNC1* over-expression in 769P cells.** c-Myc was re-expressed in *FILNC1* over-expressed 769P cells. The cells were cultured in 1 mM glucose-containing medium for 24 hours, and c-Myc protein level was detected by Western blotting (A). The expression levels of genes involved in glucose metabolism were measured by real-time PCR (B). All values represent mean  $\pm$  s.d. from three independent experiments, two-tailed Student's t-test. \*:  $P < 0.05$ ; \*\*:  $P < 0.01$ ; \*\*\*:  $P < 0.001$ .

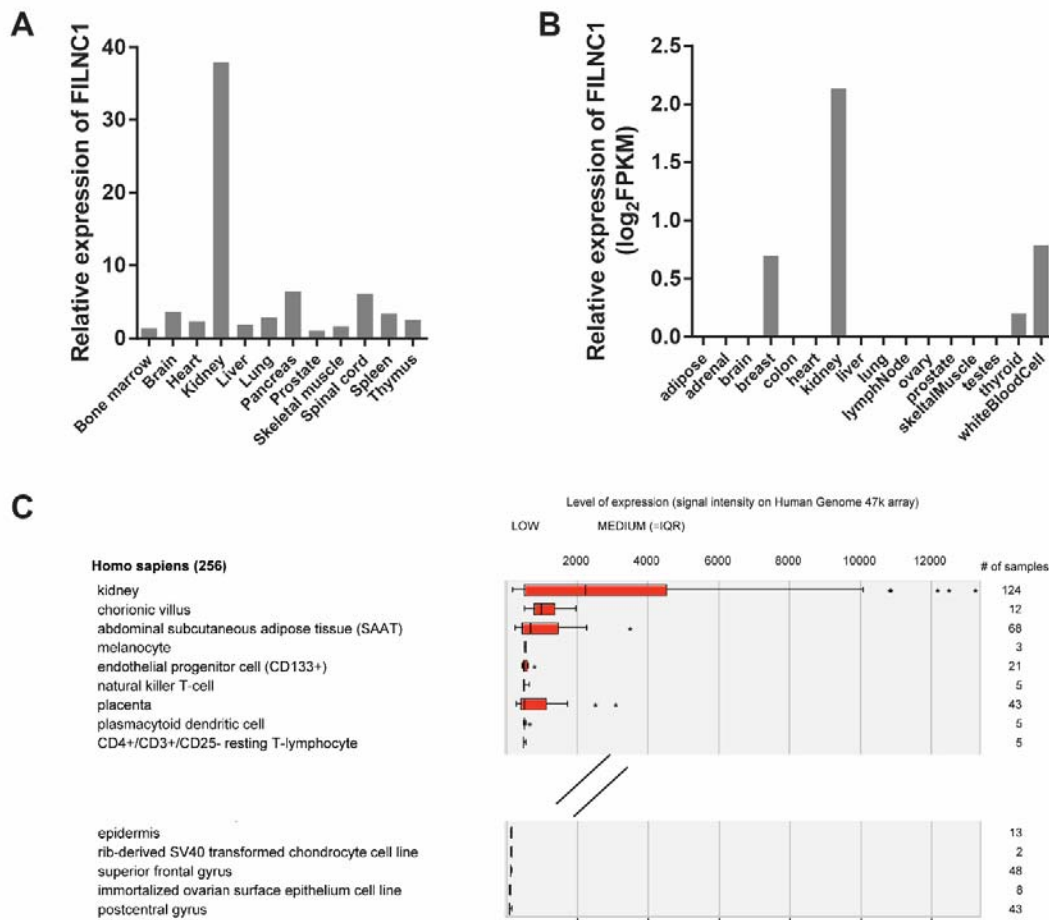

**Supplementary Figure 18. *FILNC1* is highly expressed in kidney. *FILNC1* expression levels in human tissues were examined from public data set GSE803 (A), Human lincRNA Catalog [http://www.broadinstitute.org/genome\\_bio/human\\_lincrnas/](http://www.broadinstitute.org/genome_bio/human_lincrnas/) (B), or GENEVESTIGATOR (C).**

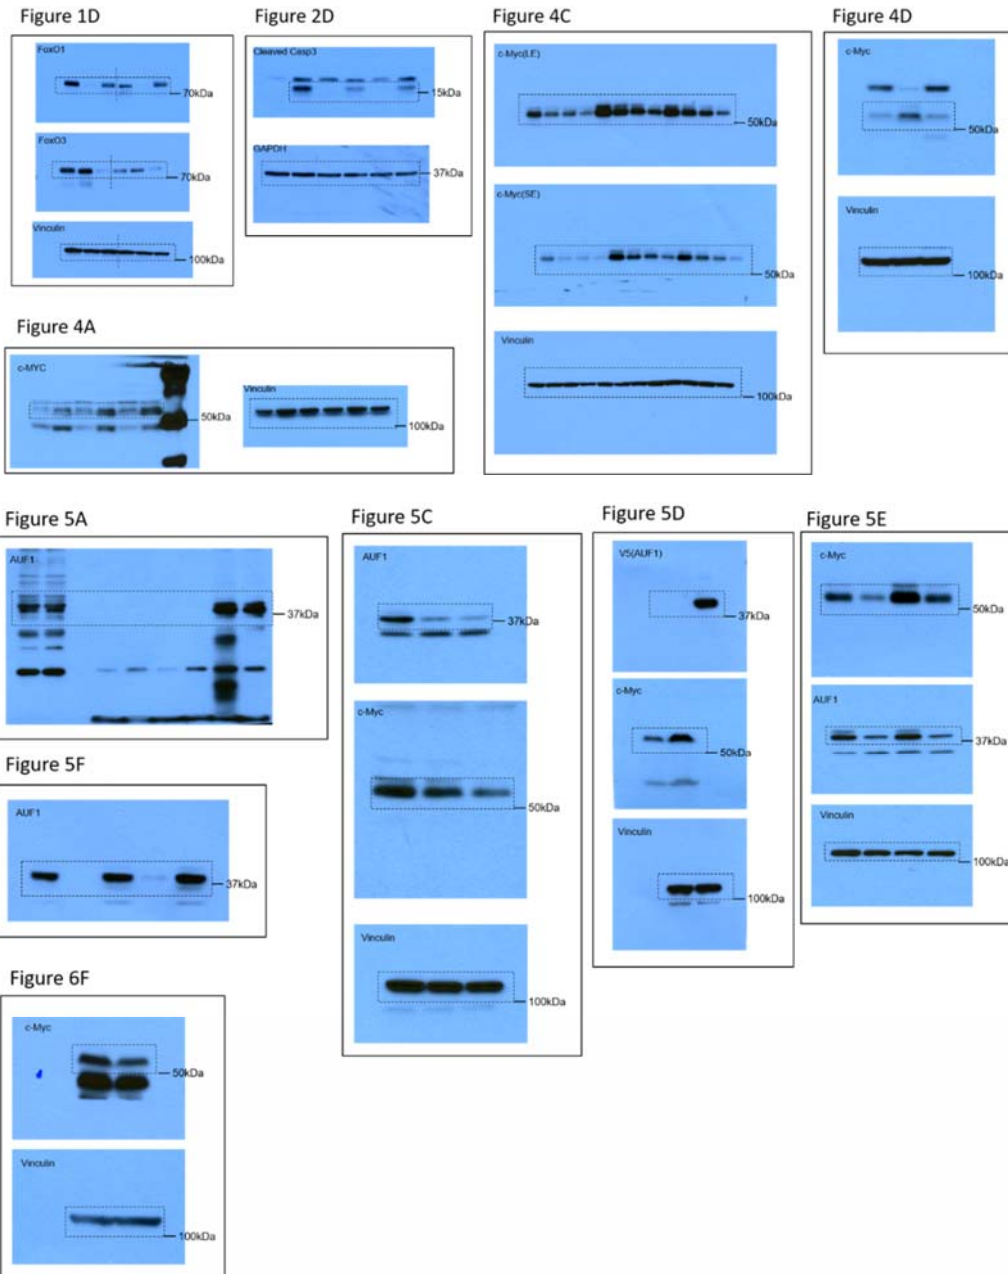

**Supplementary Figure 19. Raw western blot images corresponding with main figures. Portions of blots presented in the main paper were boxed.**

## **Supplementary Methods**

The sequences for all primer used are listed below:

### **Primers for ChIP:**

Site1-Forward: 5'- GCTTTATGCAGTGAATGAGCTTTA-3'

Site1-Reverse: 5'- AGATATCAAAGAATTTCCCCATGA-3'

Site2-Forward: 5'- CTGTGCTTCTCCCTTAAAAACAAT-3'

Site2-Reverse: 5'- TTCAATAGACACTTGCAACAGTGA-3'

### **Primers for shRNA:**

shLuc:5'-

CCGGGATTTTCGAGTCGTCTTAATCTCGAGATTAAGACGACTCGAAATCTTTTT  
G-3'

shRFP: 5'-CCGGTGCTAAGGAGTTTGGAGACAACTCGAGTTGTCTCCAAAC

TCCTTAGCATTTTTG-3'

FILNC1-shRNA1:5'-

CCGGACACGTTGGACTTGAATAATCTCGAGATTATCCAAGTCCAACGTGTT  
TTTTG-3'

FILNC1-shRNA2:5'-

CCGGGATTTCCAATCTGTGCCTAAATCTCGAGATTTAGGCACAGATTGGAATCT  
TTTTG-3'

AUF1-shRNA1:5'-

CCGGTCGAAGGAACAATATCAGCAACTCGAGTTGCTGATATTGTTTCCTTCGAT  
TTTTG-3'

AUF1-shRNA2:5'-

CCGGTCTGAAGGAACAATATCAGCAACTCGAGTTGCTGATATTGTTTCCTTCGAT  
TTTT-3'

**Real time PCR primers:**

FILNC1-Forward: 5'- CCACTCAGTTCTTCATGCTTGT-3'

FILNC1-Reverse: 5'- GAAAGGCTGTTTGTGTTTGCTGT-3'

GAPDH-Forward: 5'- CCATGGGGAAGGTGAAGGTC-3'

GAPDH -Reverse: 5'-GAAGGGGTCATTGATGGCAAC-3'

U1-Forward: 5'-TCCCAGGGCGAGGCTTATCCATT-3'

U1-Reverse: 5'-GAACGCAGTCCCCACTACCACAAAT-3'

c-Myc-Forward: 5'- CAGCTGCTTAGACGCTGGATTT -3'

c-Myc-Reverse: 5'- ACCGAGTCGTAGTCGAGGTCAT -3'

GLUT1-Forward: 5'- ATGATGCGGGAGAAGAAGGTC-3'

GLUT1-Reverse: 5'- TCGTGGAGTAATAGAAGACAGCG-3'

GLUT3-Forward: 5'- TTGAACACCTGCATCCTTGA-3'

GLUT3-Reverse: 5'- GACAGCCCATCATCATTTCC-3'

HK2-Forward: 5'- AGCCCTTTCTCCATCTCCTT-3'

HK2-Reverse: 5'- AACCATGACCAAGTGCAGAA-3'

ALDOC-Forward: 5'- CAGGGCAATGTCAGACAACT-3'

ALDOC -Reverse: 5'- GGCTGCGGCTGCTAACT-3'

PDK1-Forward: 5'- ATTTTCCTCAAAGGAACGCC-3'

PDK1-Reverse: 5'- CAACAGAGGTGTTTACCCCC-3'

PDK4-Forward: 5'- CACGATGTGAATTGGTTGGT-3'  
PDK4-Reverse: 5'- TGCCTTTGAGTGTTCAAGGA-3'  
MCT4-Forward: 5'- AAGAGCCATTGTATGTCTGGG-3'  
MCT4-Reverse: 5'- GGGACTTGCCAGTTTCTTTG-3'  
PKM1-Forward: 5'- ACCGCAAGCTGTTTGAAGAA-3'  
PKM1-Reverse: 5'- TCCATGAGGTCTGTGGAGTG-3'  
PKM2-Forward: 5'- GAGGCCTCCTTCAAGTGCT-3'  
PKM2-Reverse: 5'- CCAGACTTGGTGAGGACGAT-3'  
Renilla Luciferase-Forward: 5'- AACTGGAGCCTGAGGAGTTC-3'  
Renilla Luciferase-Reverse: 5'- TAGCTCCCTCGACAATAGCG-3'  
Firefly Luciferase-Forward: 5'- CATTCTTCGAGGCCAAGGTG-3'  
Firefly Luciferase-Reverse: 5'- CCACGATGAAGAAGTGCTCG-3'

**Primers for RNA pull down assay:**

FILNC1-Forward: 5'-  
TAATACGACTCACTATAGGGGATTTGCAGAAAGAGCCAACA-3'  
FILNC1-Reverse: 5'-AAACAAGATAGTTTATTTTTCTTGCAC-3'  
NBR2-Forward: 5'-TAATACGACTCACTATAGGGAGGGGTCCAGTTGCGGCTTAT  
-3'  
NBR2-Reverse: 5'-AGTTTACTTACTATTGCTGA -3'  
Myc 3' UTR-Forward: 5'-  
TAATACGACTCACTATAGGGGGAAAAGTAAGGAAAACGATTCCT -3'  
Myc 3' UTR -Reverse: 5'- AAGATTTGGCTCAATGATATATTTGCCAG -3'

**Primers for FILNC1 clone:**

OE-Forward: 5'-ACGCCTCGAGGATTTGCAGAAAGAGCCAACA-3'

OE- Reverse: 5'-ACGCGGATCCAAACAAGATAGTTTATTTTTCTTGAC-3'
